# Supplementary material
Source: MDPI journal article supplement (https://www.mdpi.com/2304-6732/8/9/386)

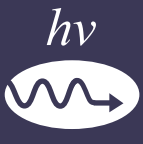

*photonics*

Supplement: s1 [file s1]

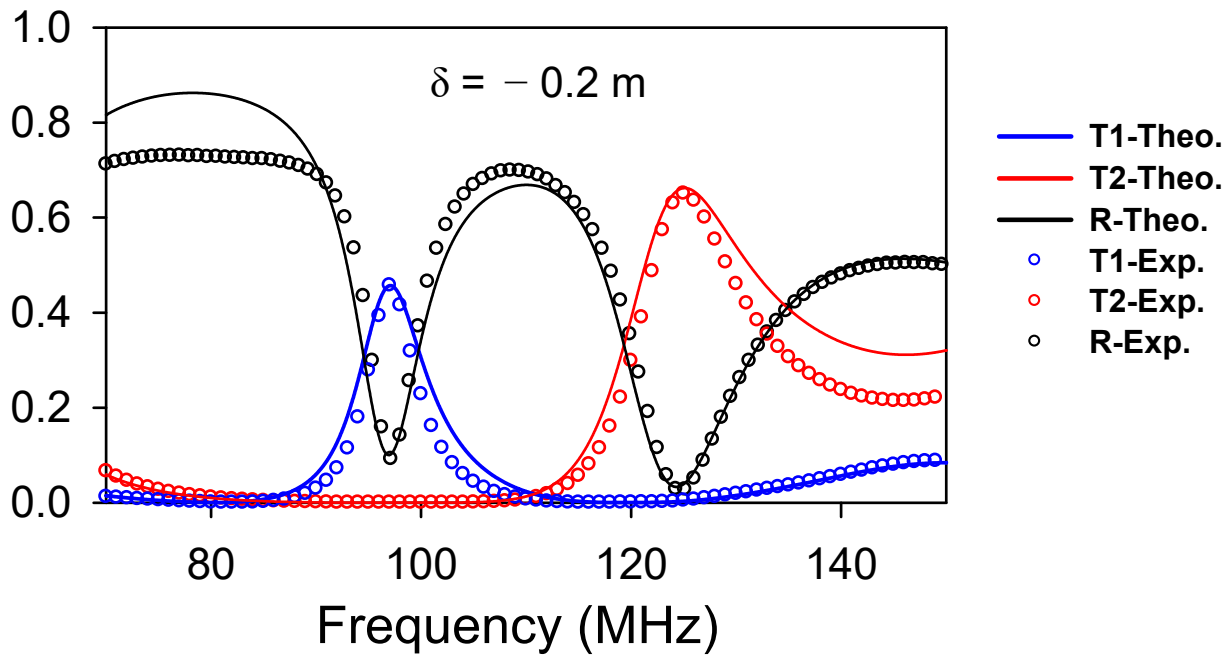

Supplement: s1 [file s1]

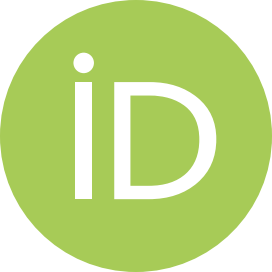

Supplement: s1 [file s1]

(a)

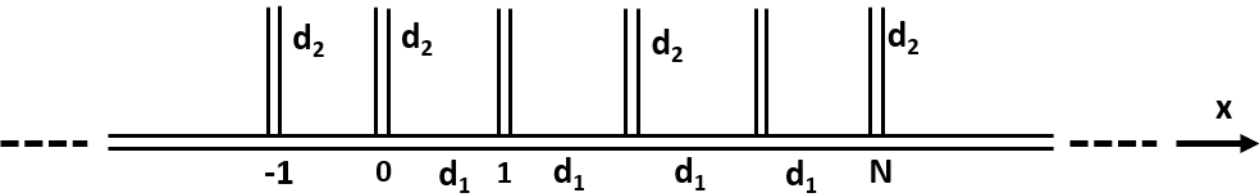

(b)

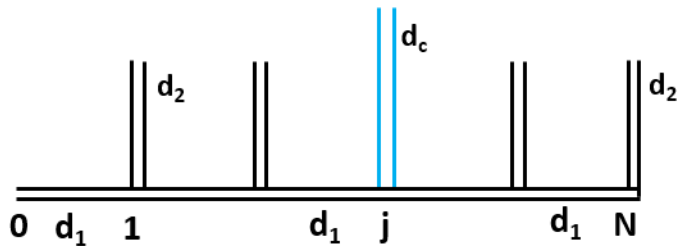

Supplement: s1 [file s1]

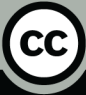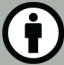

BY

Supplement: s1 [file s1]

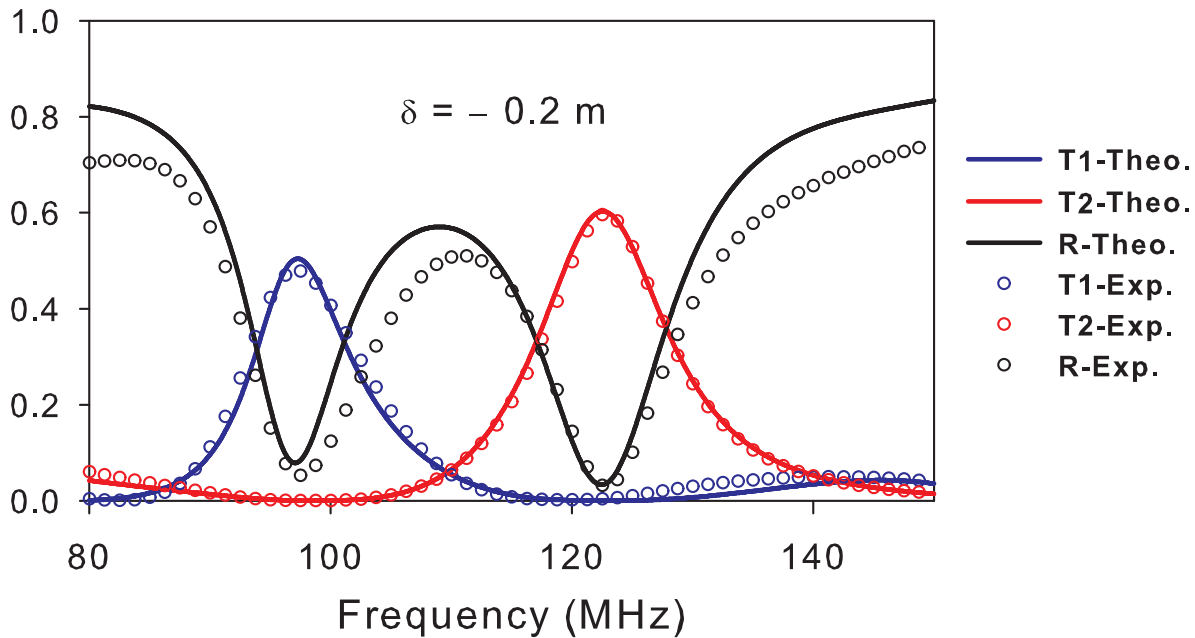

Supplement: s1 [file s1]

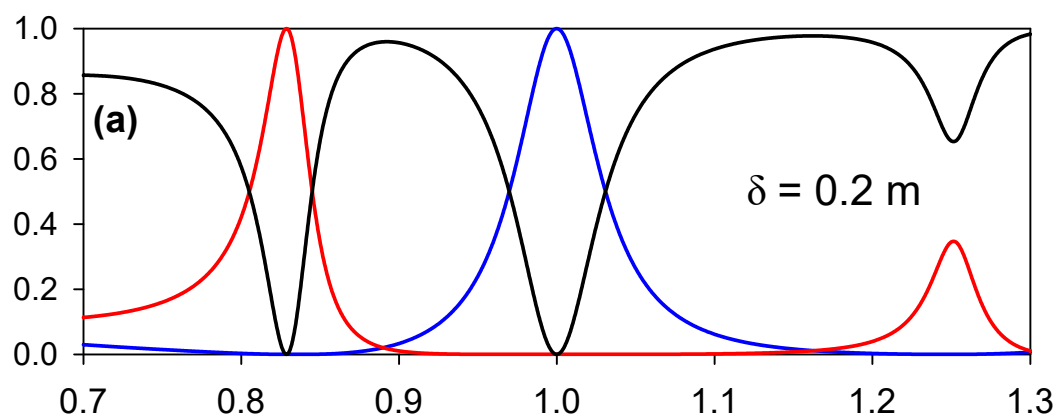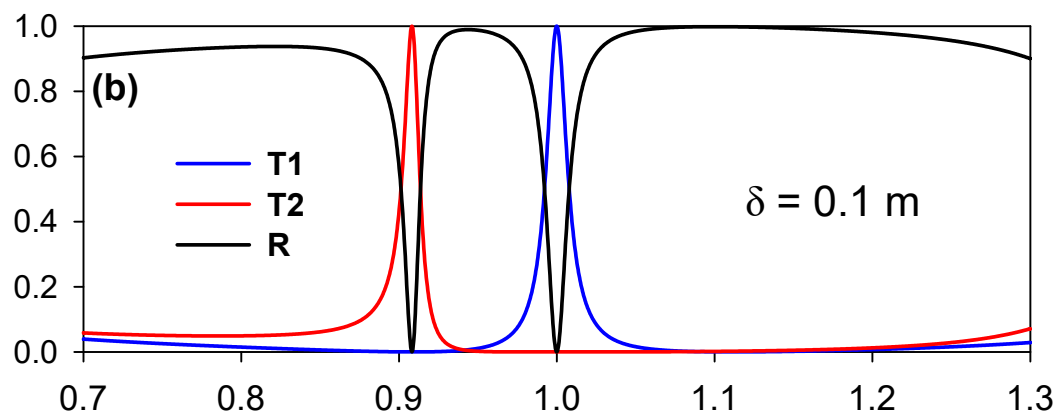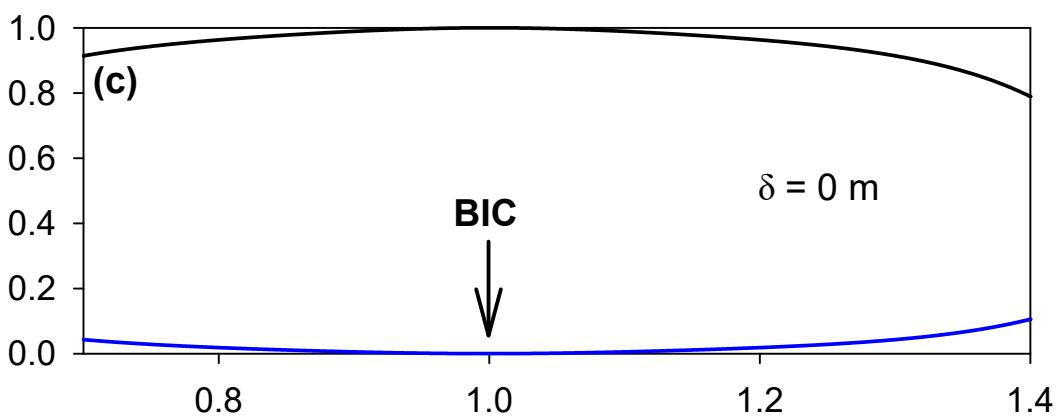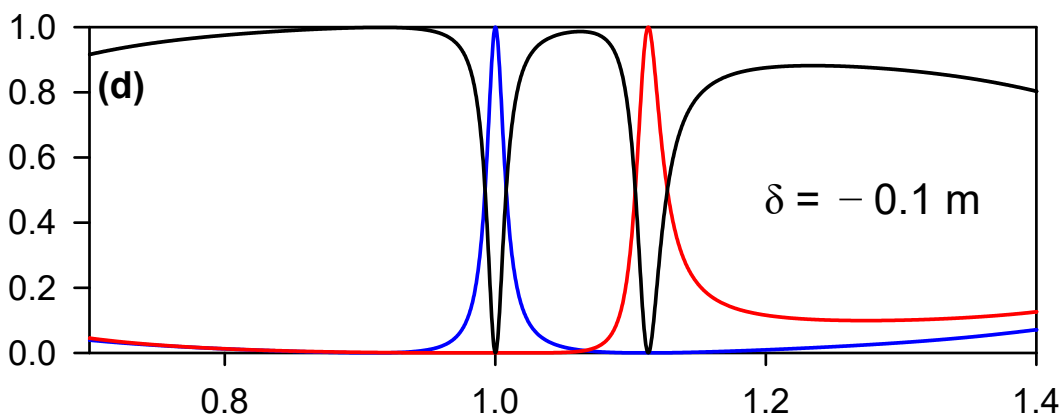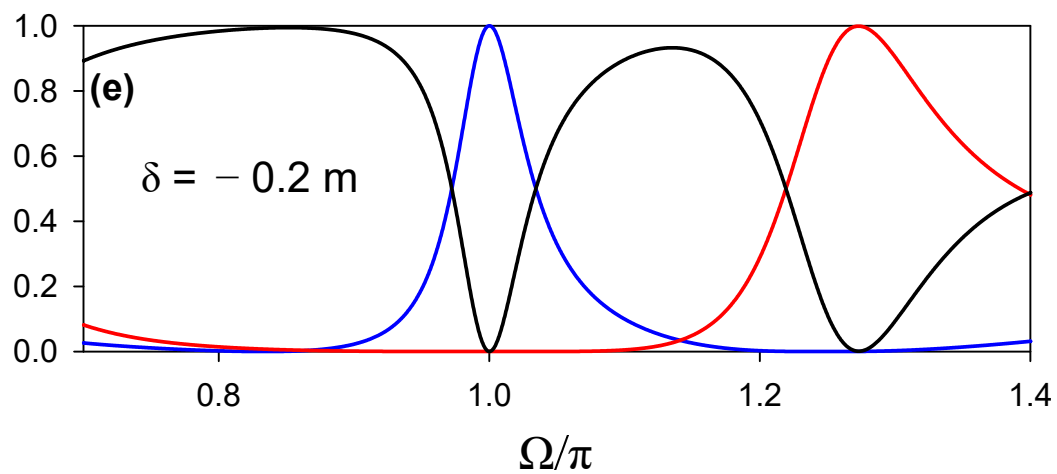

Supplement: s1 [file s1]

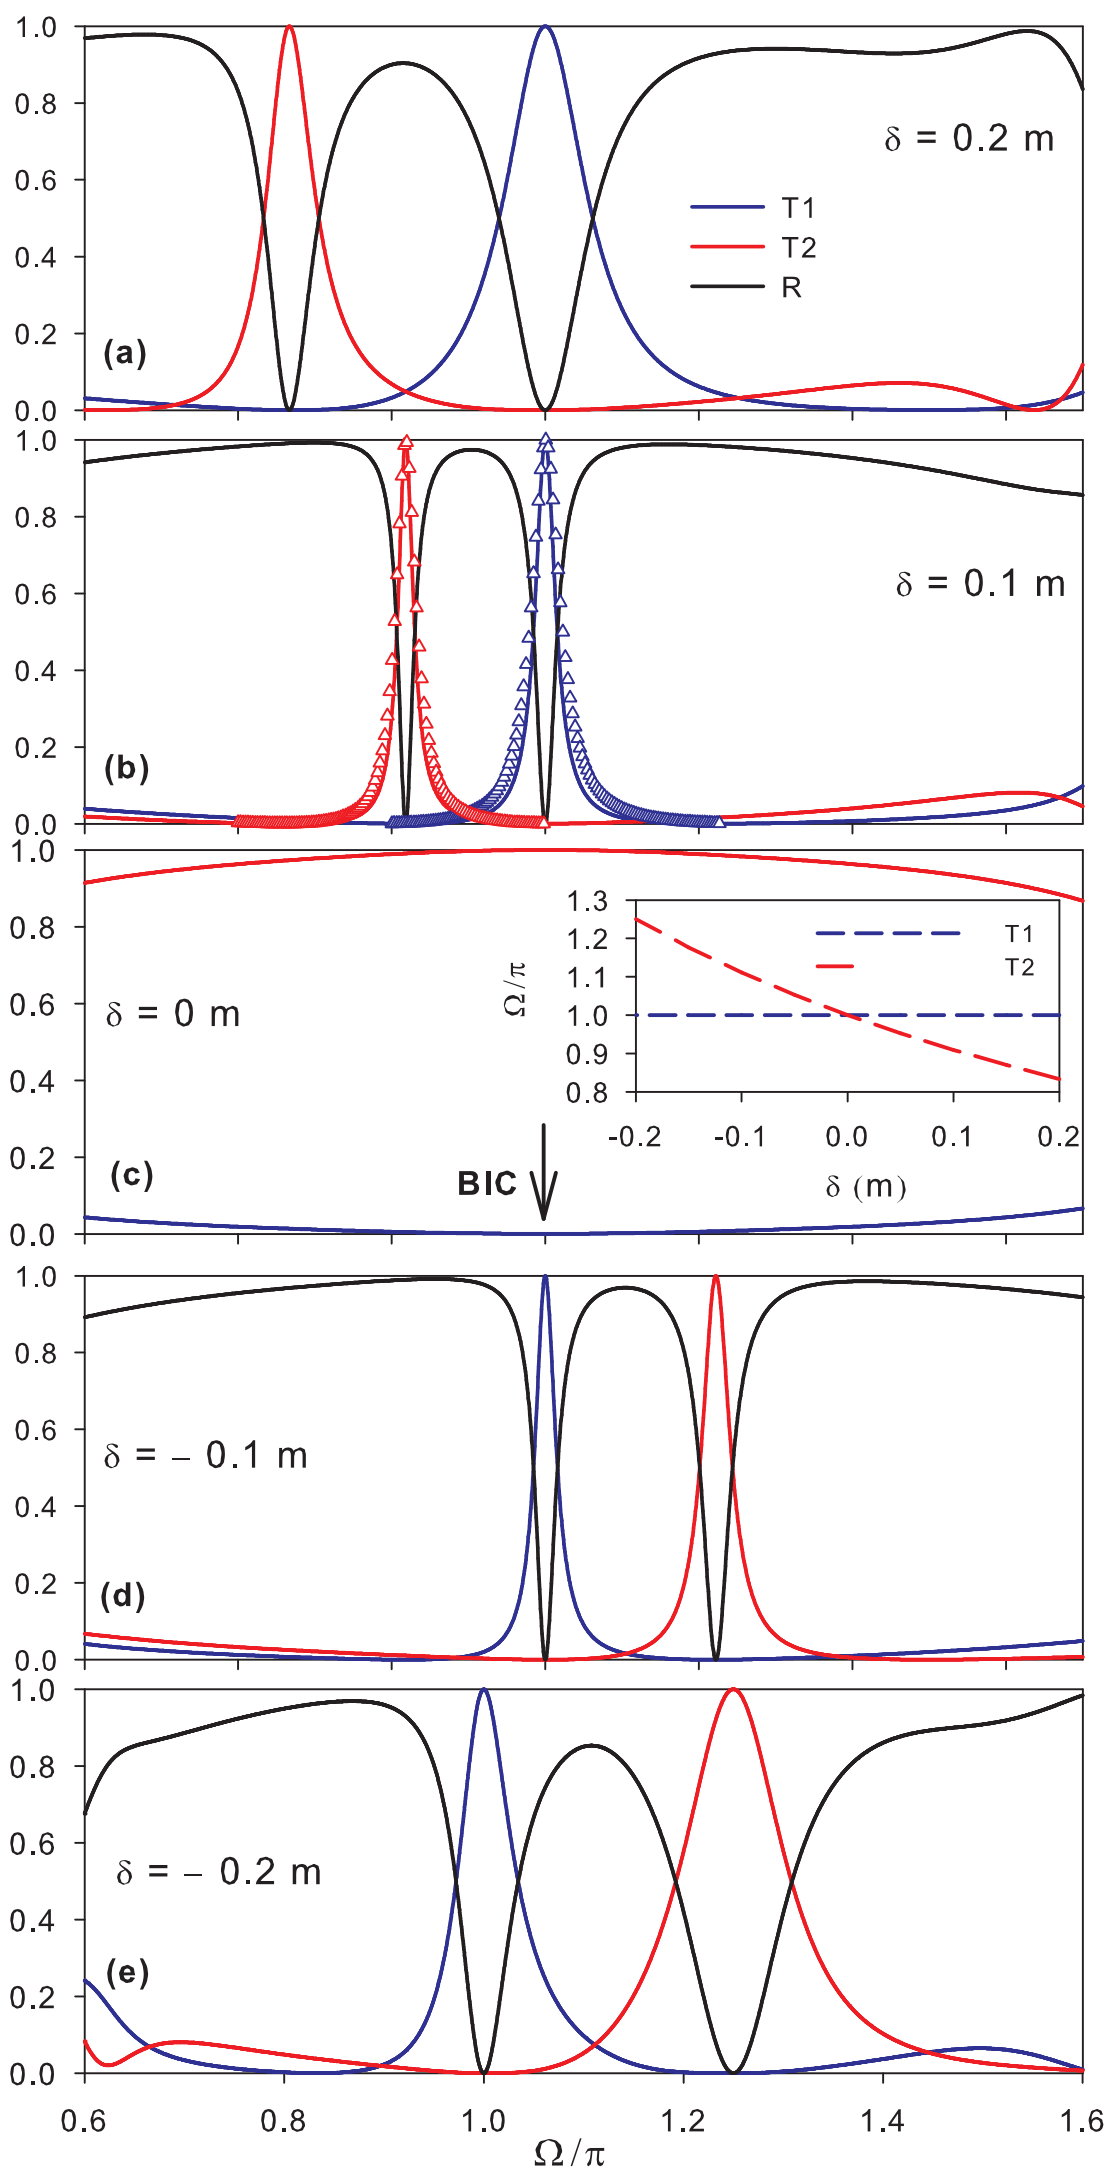

Supplement: s1 [file s1]
